# Supplementary material
Source: HighWire-hosted journal article supplement (https://bmjopen.bmj.com/content/12/7/e060253)

## Appendix 1: Data Inputs and flow for the PHM data resource

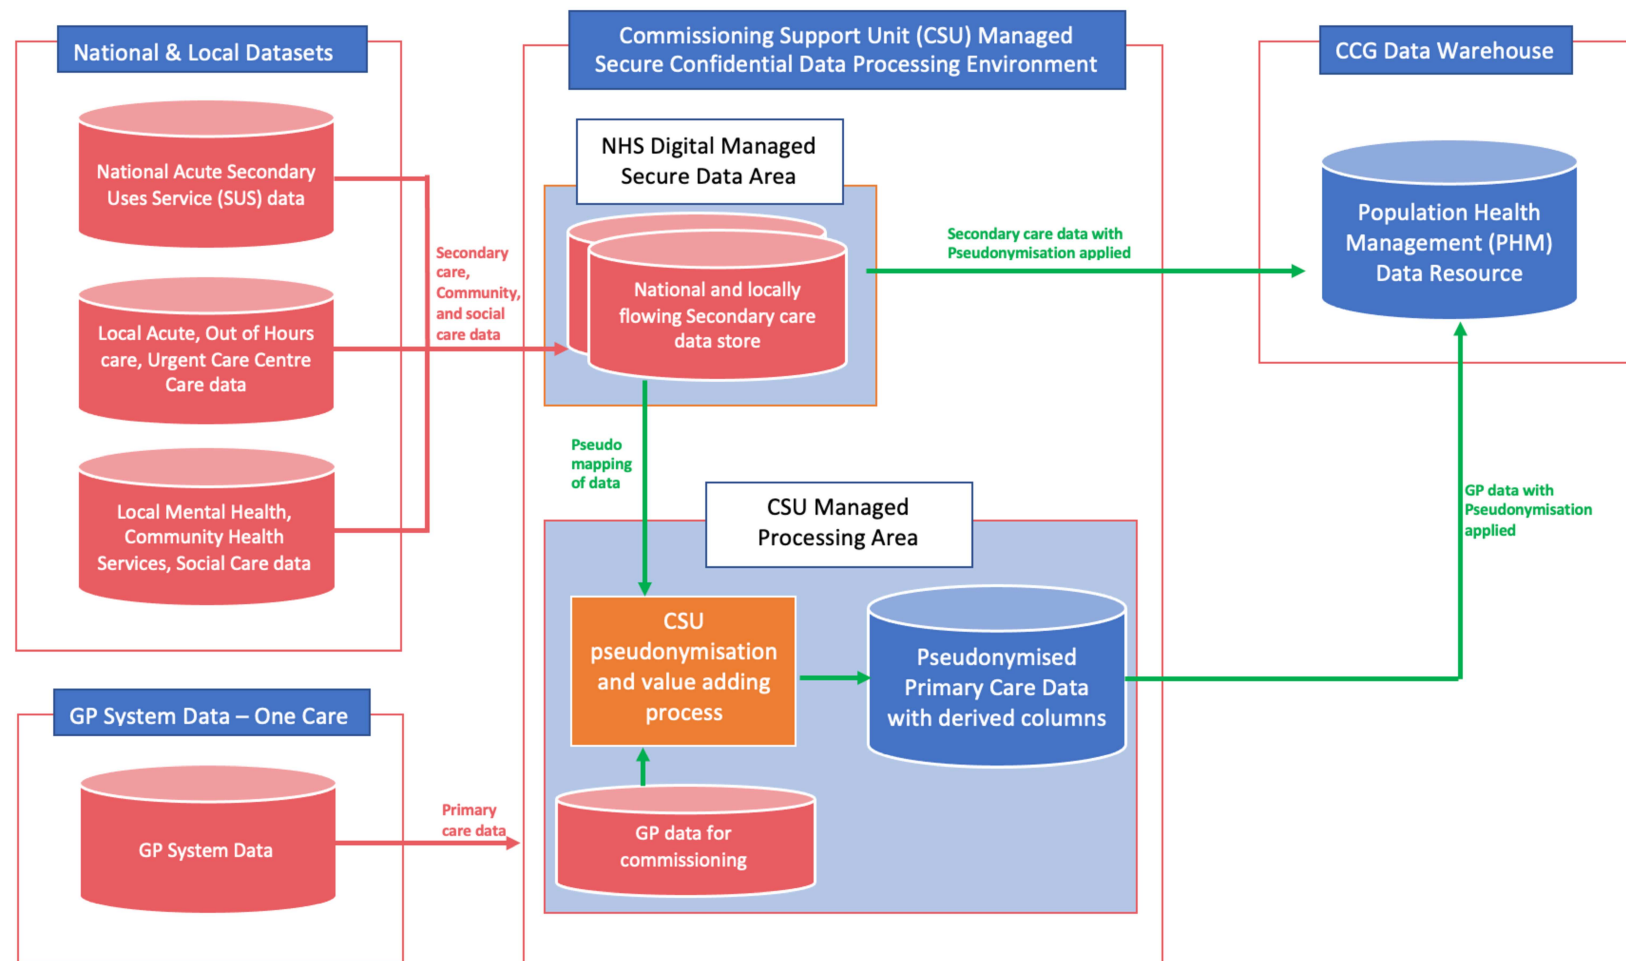

Supplement: inline-supplementary-material-1 [file inline-supplementary-material-1.pdf]
